# Supplementary material for: Kilometre-scale, kilowatt average power, single-mode laser delivery through hollow core fibre: overcoming nonlinear limits of glass fibre
Source: Research Square preprint supplement (doi:10.21203/rs.3.rs-1004375/v1), 2021-11-01
Supplement: Supplementary file 1 [file 348e9533d617228220320e6f.docx]

***Supplementary information for:***

**Kilometre-scale, kilowatt average power, single-mode laser delivery through hollow core fibre: overcoming nonlinear limits of glass fibre**

H. C. H. Mulvad1, S. Abokhamis Mousavi1, V. Zuba1, L. Xu1, H. Sakr1, T. D. Bradley1, J. R. Hayes1, G. T. Jasion1, E. Numkam Fokoua1, A. Taranta1, S.-U. Alam1, D. J. Richardson1, F. Poletti1*

1Optoelectronics Research Centre, University of Southampton, Highfield Campus, Southampton, UK.

*e-mail: [frap@orc.soton.ac.uk](mailto:frap@orc.soton.ac.uk)

**Assessment of limits to further power scaling**

This section includes a more detailed description of the numerical simulations used to obtain Fig. 4 in the main article on the scalability of power delivery.

Since the numerical model (see Methods in main article) showed very good agreement with the experimental results, being able to reproduce the small observed red-shift of the spectrum at 1 kW after 1-km NANF propagation with good accuracy (see Fig. 3b,c in the main article), it was used to investigate the scalability to higher power levels and longer NANF lengths. For comparison, simulations were also performed on a state-of-the-art solid core silica fibre designed for near-diffraction-limited power delivery. We selected the silica PCF used for power delivery of 10 kW over 30 m and 1 kW over 300 m1,2, as these values represent the highest power levels and transmission lengths reported for silica core fibres, to the best of our knowledge. For the NANF, we assumed the same parameters as in our experiment above, including the 0.74 dB/km propagation loss even though lower values can be anticipated (the effect of a recently reported 0.3 dB/km NANF loss value3 on the scalability is addressed below). The core is filled with air at atmospheric pressure. For the silica PCF, we used the parameters available from the reports. Instead of the experimentally demonstrated power × distance product of 300 kWm, we used the value 420 kWm which the authors claim is the full potential of the PCF based on the effective mode area of Aeff = 2500 µm2. For simplicity, the core is assumed to support only the fundamental mode, although the actual PCF supports 3 modes. Due to the unavailability of accurate data, the propagation loss and chromatic dispersion were assumed to be dominated by the silica material parameters. This includes a loss value of 0.67 dB/km, corresponding to the Rayleigh scattering limit of silica at the laser wavelength of 1075 nm, and which is slightly lower than the actual value extrapolated from the reported transmissivity (~0.87 dB/km)2. We recorded the output spectra of our CW laser source up to its maximum output power of Pmax = 2.2 kW and used them to model the input signal to the fibre (NANF or PCF). To simulate power levels above this value, the laser spectrum at Pmax was simply scaled using a constant factor. We simulated power levels up to a value of 5 x Pmax = 11 kW, comparable to the currently highest commercially available output power of a single-mode CW Ytterbium-doped fibre laser (10 kW). The modelling is described in more detail in Methods in the main article. For simplicity, coupling loss was ignored in these simulations. The evolution of the spectrum over fibre lengths up to 5 km were simulated. Supplementary Fig. 1 compares the evolution of the spectrum vs length for the two fibre types, shown for input powers of Pin = 1.4 kW, 2.2 kW, 4 kW, 7.9 kW and 11 kW. Since the fundamental mode propagates in silica in the PCF, and in atmospheric air in the NANF, the spectral evolution is notably different in the two fibres.

**Supplementary Fig. 1.** **Simulated spectra vs distance for single-mode CW power delivery in NANF vs silica PCF.** For both fibre types, the spectra are calculated for input powers of Pin = 1.4, 2.2, 4, 7.9 and 11 kW as indicated in the left column. Note that the range of distances shown differs between the plots, as the spectral broadening vs distance depends strongly on the fibre type and input power*.*

In the PCF, the vibrational Raman response of silica with a Stokes shift of about 440 cm-1 leads to a strong spectral broadening via the formation of several Stokes waves in the first 100 m of propagation. In the air-filled core of the NANF, the Raman response is dominated by rotational transitions of nitrogen having significantly smaller Stokes shifts, leading instead to a gradual broadening of the spectrum to the long-wavelength side. Consider, for example, the case of Pin = 11 kW as shown in the last column of Supplementary Fig. 1. Here, the spectral broadening in the NANF remains substantially lower than in the PCF for similar propagation lengths; a length of 5 km in the NANF produces a spectral broadening comparable to less than 100 m in the PCF. It should be noted that the effect of loss becomes significant after a few km (e.g., the power is reduced by 50% after 4 km in the current NANF with 0.74 dB/km loss).

**Supplementary Fig. 2. Simulations of single-mode CW power delivery in silica PCF and NANF: spectral broadening vs distance for various input powers** (PCF: dashed lines, NANF: solid lines). The spectral broadening is calculated as a 1/-1, where is a power spectrum overlap ratio – see Methods. The maximum tolerated spectral broadening is set to a value of 1 (=0.5), indicated by the horizontal dotted line. The silica PCF simulations show good correspondence with the demonstrations reported in refs1,2 as indicated by stars in the figure. Note: the power-distance product for the reported PCF (300 kWm) is slightly lower compared to the full potential of the PCF (420 kWm) which is used in our simulations.

We observed no signature of the vibrational Raman transitions of oxygen and nitrogen, neither in the experiment nor in the simulations, which is mainly attributed to the fact that the corresponding Stokes wavelengths lie outside the low-loss transmission window, see Fig. 1b in the main article. To quantify the spectral broadening and enable comparison between the PCF and the NANF, we adopted a spectral power overlap ratio function 𝜌, see Methods. In a silica fibre, the critical input power for SRS is defined as the input power leading to equal amounts of power at the pump and Stokes wavelengths. This condition corresponds to 𝜌=0.5, which we therefore used to define the critical spectral broadening both for the PCF and the NANF. Supplementary Fig. 2 compares the spectral broadening (plotted as ) vs length for the NANF and PCF for various input power values up to 11 kW (including those shown in Supplementary Fig. 1). For each input power level, the maximum permissible propagation length is found where the spectral broadening reaches the critical level (indicated by a horizontal line). Note that the power overlap calculation for the PCF predicts a maximum length of ~30 m at Pin = 11 kW and ~300 m at Pin = 1 kW, which corresponds well with the reported values as indicated in the figure. Fig. 4 in the main article shows the results for maximum propagation length plotted vs output power for the air-filled NANF (air-NANF), the silica PCF, and a standard SMF, clearly illustrating the significantly extended reach achievable with the air-NANF. For example, a maximum length of 1180 m is predicted for Pout = 10 kW for the air-NANF, a factor 28 improvement relative to the maximum of the PCF which is 42 m (or a factor 40 relative to the experimental PCF demonstration of 10 kW over 30 m). For lower output powers, the improvement factor reduces due to the influence of loss in the NANF. A 1 kW output power can be delivered over a distance of 6870 m, although it should be noted that an input power of 3.3 kW is required. This represents an improvement by a factor 17 relative to the PCF maximum of 407 m, or a factor 23 relative the experimental PCF result of 1 kW over 300 m. It must be noted that since the current simulations assume that the core only supports a single mode, they do not provide any information on potential beam degradation in a real fibre which may support a few, but lossy higher order modes. Although no detrimental effect on beam quality was observed in our demonstration of 1 kW over 1 km, future experiments are needed to confirm that this remains the case at power levels and lengths approaching the limits identified through the simulations where the SRS is higher.

Next, since the limitation in air-filled NANF is set by SRS in air, we also ran simulations where the air is replaced by a vacuum (denoted vacuum-NANF). We observed no spectral broadening up to the highest simulated input power of 11 kW, which is attributed to the negligible overlap of the fundamental mode with the glass surround. Hence, a vacuum-NANF may potentially enable output powers and transmission lengths even beyond the limit of an air-filled NANF as indicated in Fig. 4 (main article), only limited by the available laser power and the fundamentally achievable propagation loss in the NANF. As an alternative to vacuum for avoiding SRS, the NANF core could be filled with a Raman-inactive gas such as Argon. Possibly, this could happen during the fibre drawing process by using it as the pressurisation gas to the core and capillaries.

Finally, we performed simulations to investigate the effect on the scalability for the air-NANF of a newly reported record-low loss value of 0.3 dB/km3. For example, we find that a Pout = 10 kW can be delivered over a length of 1310 m, whereas a Pout = 1 kW can be delivered over 9640 m. The corresponding lengths in the case of 0.74 dB/km loss were 1180 m and 6870 m, respectively. Hence, the advantage of the lower 0.3 dB/km loss is most significant at lower power levels and longer transmission lengths, where it also enables a notably higher transmission efficiency relative to the already low 0.74 dB/km loss of the current NANF.

**Impact of bending losses**

We foresee that NANFs will be suitable for practical deployment without significant impact of macro- and micro-bending effects on their low-loss performance. Macrobending loss for the current 1-km NANF is low, with a predicted value of 0.1 dB/km at 300mm bending diameter, hence is not expected to become a concern in a practical power delivery scenario where the minimum bending diameter typically is higher. Note that the state-of-the-art silica PCF already requires a bending diameter larger than 1000mm to reduce the bending loss to a similar level2. The NANF was rewound at low tension, thus imposing minimum external stress on the fibre. In practice, the NANF must be cabled which may induce additional stress. In such a situation however, microbending losses due to external perturbations can be minimised by an optimised coating, e.g., by using a dual layer with two materials having low and high Young’s moduli4. Another method is to increase the stiffness of the fibre by enlarging the cladding, although an upper limit is set by the requirement of a practical bending radius without risk of fibre breakage.

**Technical improvements needed to realise higher power and longer distance transmission**

We envisage that progress in NANF fabrication and improvements of the coupling setup will enable demonstrations of even higher powers and transmission lengths compared to the 1kW-1km result reported here. In terms of NANF propagation loss, the 0.74 dB/km value employed in both the experiment and the simulations is still well above the fundamental loss limits for this fibre type. The NANF fabrication process is being continually refined enabling improved control of the geometrical parameters, leading to further reductions of the propagation loss. Indeed, a 5-tube 2-km long NANF with a record-low 0.3 dB/km loss at 1075 nm was recently reported3. As explained above, this may further extend the length limits in Fig. 4 (main article) based on a 0.74 dB/km loss value. Note also that a loss value of 0.55 dB/km at 1075 nm in a 6-tube NANF was reported during the course of these experiments, although in a shorter fibre length of about 400 m5. Results on kW power delivery in this fibre are included further below.

In terms of improving the laser-to-fibre coupling performance, a first step would be to employ lenses made of high purity grade fused silica with reduced absorption in the near infrared instead of the current “UV grade” fused silica lenses. Paired with an anti-reflection coating with minimal absorption, such lenses should result in a significant reduction in the thermal lensing effects, and hence allow for the high CE of ~95% to be maintained at power levels well above 1 kW. Another approach is the combination of substrates having refractive index temperature coefficients dn/dT of opposite signs to cancel or suppress the overall thermal lensing of the coupling setup, as employed e.g. in the 10 kW silica-PCF demonstration1. An alternative coupling method could be a tapered fibre inserted directly into the hollow core, potentially enabling both low coupling loss and self-stabilisation at high power levels6,7. With increasing input powers, thermal management of the coating will also become a necessity due to absorption of the non-coupled light, considering the coating temperature is already exceeding 70 °C at the current input power level of 1.38 kW. Rather than resorting to cooling, it would be preferable to extract the excess light from the cladding before it reaches the coated region of the fibre. Various methods for cladding light extraction (CLE) have been demonstrated, e.g. refs8,9, and should be applicable to NANF. Another option is to use a low-index coating material to reduce the coupling of light from the cladding, e.g. as in ref2, although this might in turn require management of residual cladding light at the fibre output.

**Power delivery of >1 kW over 10-m and 415-m NANFs with 0.55 dB/km loss at 1075 nm**

In preparation for the 1-kW power delivery demonstration reported in the main text on a 1-km NANF (denoted here as NANF-1), tests were conducted on shorter fibre samples from a separate NANF (denoted as NANF-2). The NANF-2 was characterised in detail in a previous publication, see ref5, where it is denoted as “NANF-A”. It has a similar 6-tube structure to NANF-1, with a core diameter of 32 um and a cladding diameter of 206 um. Most notably, NANF-2 has an even lower propagation loss of 0.55 dB/km at 1075 nm, compared to the 0.74 dB/km of NANF-1. The coupling setup used with NANF-2 was identical to Fig. 2 (main article), although a different set of lenses were used. The lens form and substrate was identical to those employed in Fig. 2, but the coating was of a broadband-type (f1: LA4148-B with 50-mm focal length, f2: LA4725-B with 75-mm focal length). At the output of the fibre, only the power was measured. The spectra were not measured and the output mode imaging setup in Fig. 2 (main article) had not been implemented. Otherwise, the experimental procedure was as described in Methods. First, a short 10-m sample of NANF-2 was used for alignment of the coupling system, after which the full available length of 415 m of NANF-2 was tested. The results can be seen in Supplementary Fig. 3, showing the output power (Pout) and throughput efficiency (TE) vs input power (Pin). Note that the step-like increases in TE observable in the figure occur when the NANF input tip is shifted to compensate for the thermal lensing. For the 10-m NANF-2, a maximum Pout = 1296 W was achieved for Pin = 1409 W, corresponding to a TE = 92%. At the lower power levels before onset of thermal lensing a TE = 95% is achieved, mainly limited by coupling efficiency since the propagation loss is negligible over 10 m. The CE drop to 92% at the highest input power is attributed to thermal-lensing related beam distortion that could not be compensated by shifting the NANF input tip. For the 415-m NANF-2, a maximum Pout = 1230 W was achieved for a Pin = 1358 W, corresponding to a TE = 90% or total loss of 0.46 dB. Here, 0.23 dB is attributed to propagation loss, measured to 0.55 dB/km using the cutback method in a separate experiment5. The remaining 0.23 dB is attributed to coupling loss, corresponding to a 95% coupling efficiency. For the 415m NANF-2, no noticeable drop in TE at higher input powers due to thermal lensing effects was observed. The reason for this difference in behaviour between the two fibre samples is unclear. A possibility is that an optimum position of the 10-m NANF-2 input tip was not successfully achieved at high power levels, hence causing insufficient compensation for the thermal-lensing induced shift of the incoming beam waist. The result of 1.23 kW output power with TE = 90% over the 415 m NANF-2 provides an additional demonstration of the advantage of low-loss NANF fibres for power delivery over considerable distances.

**Supplementary Fig. 3. Power delivery performance for 10-m and 415-m samples of NANF-2 (propagation loss 0.55 dB/km at 1075 nm).** Left axis: Output power (Pout) vs input power (Pin). Right axis: throughput efficiency (Pout/Pin).

**References**

1. Okuda, T., Fujiya, Y., Goya, S. & Inoue, A. Beam Transmission Technology by Photonic Crystal Fiber to Realizes High-precision and High-efficiency Laser Processing Technology. *Mitsubishi Heavy Ind. Tech. Rev.* **57** (2020).

2. Matsui, T. *et al.* Effective Area Enlarged Photonic Crystal Fiber with Quasi-Uniform Air-Hole Structure for High Power Transmission. *IEICE Trans. Commun.* **E103.B**, 415-421 (2020).

3. Sakr, H. *et al.* Hollow Core NANFs with Five Nested Tubes and Record Low Loss at 850, 1060, 1300 and 1625nm. in *Optical Fiber Communication Conference (OFC) 2021.* F3A.4 (Optical Society of America, 2021).

4. Gloge, D. Optical-fiber packaging and its influence on fiber straightness and loss. *The Bell System Technical Journal* **54**, 245-262 (1975).

5. Sakr, H. *et al.* Hollow core optical fibres with comparable attenuation to silica fibres between 600 and 1100 nm. *Nat. Commun.* **11**, 6030 (2020).

6. Huang, W. *et al.* Low-loss coupling from single-mode solid-core fibers to anti-resonant hollow-core fibers by fiber tapering technique. *Opt. Express* **27**, 37111-37121 (2019).

7. Xie, S., Pennetta, R. & Russell, P. S. J. Self-alignment of glass fiber nanospike by optomechanical back-action in hollow-core photonic crystal fiber. *Optica* **3**, 277-282 (2016).

8. Yan, P. *et al.* Kilowatt-level cladding light stripper for high-power fiber laser. *Appl. Opt.* **56**, 1935-1939 (2017).

9. Wysmolek, M. *et al.* Microstructured fiber cladding light stripper for kilowatt-class laser systems. *Appl. Opt.* **57**, 6640-6644 (2018).
